**CORRESPONDENCE****Effects of Apnea on Blood Acid-Base Parameters**

*To the Editor.*—By means of artificial re-breathing, Eger and Severinghaus (ANESTHESIOLOGY 22: 419, 1961) recently evaluated the rate of rise of alveolar  $P_{CO_2}$  in five apneic, anesthetized patients, before and after hyperventilation. These workers observed a rapid elevation in alveolar  $P_{CO_2}$  of about 13 mm. of mercury during the first minute of apnea, followed by a linear increase at an approximate rate of 3 mm. of mercury/minute. These findings prompted our investigation of blood acid-base parameters in a patient during a five-minute period without ventilation.

Anesthesia was induced in a clinically healthy subject prior to elective surgery by intravenous administration of thiopental. Capillary blood specimens were collected immediately before and at one-minute intervals after complete suppression of spontaneous respiration by a dose of succinylcholine. pH measurements made in an Astrup Micro-analyzer were used to obtain values for acid-base parameters by nomographic interpolation (table). Cessation of respiration for one minute was associated with a rise in blood  $P_{CO_2}$  of 10.9 mm. of mercury which is close to alveolar  $P_{CO_2}$  values observed by Eger and Severinghaus for the same apneic period. However, throughout the entire apneic period the increase in blood  $P_{CO_2}$ /minute averaged 8 mm. of mercury, which was about double the mean rate of rise in alveolar  $P_{CO_2}$  noted by these workers.

Astrup analyses indicate that accumulation of  $CO_2$  was accompanied by a fall in blood pH as well as a rise in actual bicarbonate levels. The decline of pH was 0.04 unit/minute, thereby producing a moderate degree of respiratory acidosis during the apneic period. Concomitant increases in actual bicarbonate may be interpreted as reflecting a compensatory mechanism. It is noteworthy that standard bicarbonate levels showed little fluctuation at the time intervals studied. Therefore, these data support the proposal of Astrup and co-workers (Lancet 1: 1035, 1960) that standard bicarbonate levels are largely independent of ventilation.

Our investigation suggests that on an individual basis it may be difficult to predict the rate of rise of blood  $P_{CO_2}$  with any degree of certainty. As pointed out by Eger and Severinghaus, any factor which affects  $CO_2$  storage or metabolism in the body is capable of altering the accumulation rate. Thus  $CO_2$  homeostasis may best be evaluated by repeated blood measurements during surgical anesthesia.

GLENN F. GORDON, M.D.,  
ROBERT G. CRAIG, M.D., AND  
RONALD L. SEARCY, PH.D.  
*Los Angeles County General  
Hospital (Unit 2)  
Los Angeles, Calif.*

Acid-Base Parameters by Nomographic Interpolation Obtained from pH Measurements

| Minutes of Apnea | pH   | $P_{CO_2}$<br>(mm. Hg) | Actual<br>Bicarbonate<br>(mEq./liter) | Standard<br>Bicarbonate<br>(mEq./liter) | Total $CO_2$<br>(mEq./liter) | Base Excess<br>(mEq./liter) | Buffer Base<br>(mEq./liter) |
|------------------|------|------------------------|---------------------------------------|-----------------------------------------|------------------------------|-----------------------------|-----------------------------|
| 0                | 7.46 | 33.1                   | 24.5                                  | 25.0                                    | 25.5                         | +2.5                        | 45.2                        |
| 1                | 7.36 | 44.0                   | 23.8                                  | 23.6                                    | 25.1                         | +1.0                        | 42.0                        |
| 2                | 7.33 | 53.5                   | 27.5                                  | 24.8                                    | 29.1                         | +1.5                        | 51.2                        |
| 3                | 7.29 | 55.0                   | 25.0                                  | 24.2                                    | 25.7                         | +1.5                        | 42.8                        |
| 4                | 7.26 | 70.0                   | 29.5                                  | 24.5                                    | 31.6                         | +2.0                        | 49.5                        |
| 5                | 7.26 | 73.0                   | 32.0                                  | 24.2                                    | 34.2                         | +1.8                        | 53.0                        |
